# Supplementary material for: miR-155: A Potential Biomarker for Predicting Mortality in COVID-19 Patients
Source: MDPI journal article supplement (doi:10.3390/jpm12020324), 2022-02-21
Supplement: s1 [file s1]

**Table S1: Demographic parameters of the COVID-19 patients**

| Parameter                  | Survivors (n=31)  | Dead (n=6)     | <i>P</i> value |
|----------------------------|-------------------|----------------|----------------|
| Age (years) (Median (IQR)) | 69(54-81)         | 63(53.75-77.5) | 0.65           |
| Gender (male)              | 21(67.74%)        | 5(83.33%)      | 0.64           |
| Blood type                 | A+ 9(47.36%)      | A+ 3(50%)      | 0.72           |
|                            | B+ 4(21.05%)      | AB+ 1(16.7%)   |                |
|                            | AB+ 3(15.78%)     | O+ 2(33.3%)    |                |
|                            | O+ 3(15.78%)      |                |                |
|                            | N/A 12            |                |                |
| BMI                        | 27.75(25.2-32.43) | 30.9(23.1-35)  | 0.90           |
| Diabetes                   | 7(22.58%)         | 2(33.33%)      | 0.62           |
| IHD                        | 3(9.67%)          | 0(0%)          | 1.00           |
| CVE                        | 2(6.45%)          | 1(16.66%)      | 0.42           |
| Malignancy                 | 2(6.45%)          | 0(0%)          | 1.00           |
| HTN                        | 14(45.16%)        | 3(50%)         | 1.00           |
| Dyslipidemia               | 9(29.03%)         | 3(50%)         | 0.4            |
| CRF                        | 4(12.9%)          | 0(0%)          | 1.00           |
| COPD/CLD                   | 2(6.45%)          | 1(16.66%)      | 0.42           |

Abbreviations: BMI- Body mass index; IHD-ischemic heart disease; CVE-cerebrovascular event; HTN-hypertension; CRF-chronic renal failure; COPD-chronic obstructive pulmonary disease; CLD-chronic lung disease

**Table S2: Clinical parameters and outcome of patients with COVID-19**

| Parameter                                              | Home /rehab (n=31) | Death (n=6)         | <i>P</i> value |
|--------------------------------------------------------|--------------------|---------------------|----------------|
| s\f ratio                                              | 320(125-442.85)    | 234.8(144.28-373.8) | 0.95           |
| Ventilation days                                       | 0(0-16)            | 21(12-45)           | 0.01           |
| Hospitalized days                                      | 15(8-33)           | 31(26.75-64.5)      | 0.05           |
| Intubated                                              | 12(38.7%)          | 6(100%)             | 0.008          |
| Worst respiratory support:                             |                    |                     |                |
| No respiratory support                                 | 15(48.39%)         | 0                   | 0.10           |
| With respiratory support<br>(non-invasive or invasive) | 13(41.94%)         | 5(83.33%)           |                |
| ECMO                                                   | 3(9.67%)           | 1(16.67%)           | 0.52           |

Abbreviations: S/F = Spo2/Fio2; ECMO – extracorporeal membrane oxygenation

**Table S3: Expression of miRNAs in the blood of patients with COVID-19**

| MiRNA                               | Survivors (n=31)  | Dead (n=6)        | <i>P</i> value |
|-------------------------------------|-------------------|-------------------|----------------|
| MiR-21 (2 <sup>-dCt</sup> X 100)    | 7.04(4.51-13.76)  | 7.93(4.91-24.3)   | 0.56           |
| MiR-146a (2 <sup>-dCt</sup> X 1000) | 18.57(9.68-35.66) | 22.41(7.09-58.45) | 0.96           |
| Mi146b (2 <sup>-dCt</sup> X 1000)   | 5.27(3.07-9.85)   | 4.9(1.3-13.61)    | 1.00           |
| MiR-155 (2 <sup>-dCt</sup> X 10000) | 4.12(2.08-7.01)   | 2.07(1.34-2.56)   | 0.01           |
| MiR-499 (2 <sup>-dCt</sup> X 1000)  | 1.4(1.17-2.41)    | 0.98(0.35-1.77)   | 0.11           |
